# Supplementary material
Source: Springer Nature journal article supplement (https://www.springermedizin.de/resource/supplementary/12913_2014_3390_MOESM3_ESM.pdf/9532652)

AMI (excludes trusts with <10 expected events)

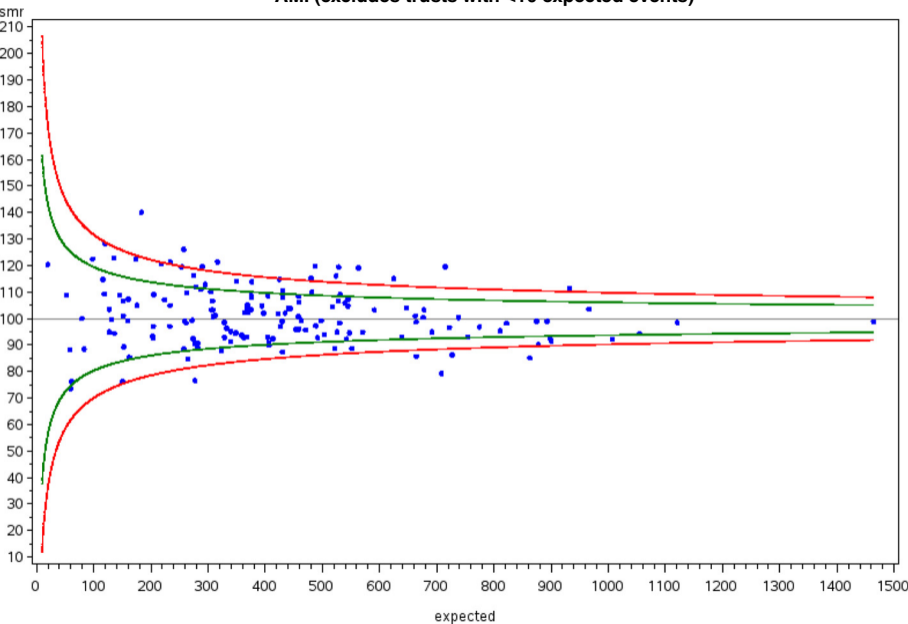

Supplement: MOESM3 [file 9532652]
